# Supplementary material for: A Single-center Comparison of Unipedicled and Bipedicled Diep Flap Early Outcomes in 98 Patients
Source: PubMed Central journal article supplement — Plast Reconstr Surg Glob Open. 2023 Jun 23;11(6):e5089. doi: 10.1097/GOX.0000000000005089 (PMC10289681; doi:10.1097/gox.0000000000005089), 2023-06-23
Supplement: gox-11-e5089-s001.pdf [file gox-11-e5089-s001.pdf]

| Authors                    | N    | Hernia               | Bulging                                       | Hernia/bulging                               | Mean follow up (months)                    |
|----------------------------|------|----------------------|-----------------------------------------------|----------------------------------------------|--------------------------------------------|
| Mennie et al. [32]         | 5144 | 1.2% (hernia repair) |                                               |                                              | 28.0-37.0                                  |
| Ochoa et al. [36]          | 126  |                      |                                               | 0                                            | 9.5                                        |
| Tomouk et al. [37]         | 130  | 3.8%                 | 2.3%                                          |                                              | >18                                        |
| Uda et al. [43]            | 42   | 0                    | 7.1%                                          |                                              | 6.0                                        |
| Chang et al. [35]          | 416  |                      |                                               | 4.6%                                         | 53.8                                       |
| Chun et al. [44]           | 58   | 0                    | 6.9%                                          |                                              | 27.6                                       |
| Erdmann-Sager et al. [27]  | 445  |                      |                                               | 1.7%                                         | 24.0                                       |
| Garvey et al. [29]         | 407  | 0.5%                 | 3.4%                                          |                                              | 31.0                                       |
| Han et al. [54]            | 25   | 0                    |                                               |                                              | 47.2                                       |
| Hembd et al. [59]          | 409  |                      |                                               | 6.0%                                         | 18.5                                       |
| Knox et al. [38]           | 130  | 0                    | 3.1%                                          |                                              | 20.0                                       |
| Laporta et al. [60]        | 387  |                      |                                               | 0.7% in control group;<br>2.8% in scar group | 58.0 (control group);<br>46.0 (scar group) |
| Macadam et al. [26]        | 670  | 1.9%                 | 2.7%                                          | 3.1% (requiring surgery)                     | 53.7                                       |
| Nelson et al. [47]         | 53   | 0                    | 1.0%                                          |                                              | 12.0                                       |
| Niddam et al. [61]         | 50   | 4.0%                 |                                               |                                              | 18.3 (median follow up)                    |
| Ochoa et al. [62]          | 418  | 1.4%                 | 0.2%                                          |                                              | 35.7                                       |
| Paik et al. [53]           | 217  | 0                    | 3.7%                                          |                                              | Not mentioned                              |
| Seal et al. [54]           | 26   | 0                    |                                               |                                              | 20.2                                       |
| Seidenstuecker et al. [55] | 908  | 0.1%                 | 2.4%                                          |                                              | 24.0                                       |
| Shubinets et al. [34]      | 3364 | 1.8% (hernia repair) |                                               |                                              | 48.0                                       |
| Tan et al. [48]            | 180  |                      |                                               | 7.2%                                         | 24.0                                       |
| Uda et al. [65]            | 49   |                      | 0 in M-DIEP group<br>9.1% in L-DIEP group     |                                              | 6.0                                        |
| Uda et al. [66]            | 67   |                      | 5.1% in S-DIEP group<br>13.3% in D-DIEP group |                                              | 6.0                                        |
| Venkat et al. [37]         | 54   | 0                    | 1.9%                                          |                                              | 7.4 (median follow up)                     |
| Wan et al. [40]            | 200  |                      |                                               | 2.1%                                         | Not mentioned                              |
| Zhong et al. [49]          | 244  | 1.5%                 | 4.5%                                          |                                              | Not mentioned                              |
| Mauch et al. [32]          | 214  | 4.6% (hernia repair) |                                               |                                              | 57.2                                       |
| Munder et al. [64]         | 1124 | 0.2%                 |                                               |                                              | 24.0                                       |
| Park et al. [50]           | 463  |                      |                                               | 5.0%                                         | Not mentioned                              |

M-DIEP: DIEP flap based on medial row perforators;

L-DIEP: DIEP flap based on lateral row perforators;

S-DIEP: single-pedicled DIEP flap;

D-DIEP: double-pedicled DIEP flap
